# Supplementary material for: Knowledge and Attitudes Survey of General Practitioners and Paediatricians Regarding Childhood Hearing Loss in Casablanca, Morocco
Source: Research Square preprint supplement (doi:10.21203/rs.3.rs-6785205/v1), 2025-07-23
Supplement: Supplementary file 1 [file 547f840e6843c2c6ccead925.docx]

# Detailed Questionnaire: Knowledge, Attitudes and Practices on Childhood Hearing Loss

## Section 1: Demographic and Professional Information

1. 1. What is your current medical specialty?
2. 2. What is your current professional title? (Intern / General Practitioner / Pediatric Resident / Pediatrician / Other)
3. 3. How many years of experience do you have in clinical practice?
4. 4. What is your age?
5. 5. What is your gender? (Male / Female / Prefer not to say)
6. 6. What is your primary work setting? (Private / Public / Both)
7. 7. What percentage of your patients are children under 5 years old?
8. 8. How many children with suspected or confirmed hearing loss have you seen in the past 3 years?

## Section 2: General Knowledge and Perceptions

1. 1. Hearing loss in children can be a severely disabling condition. (Likert Scale: Strongly disagree to Strongly agree)
2. 2. Do you routinely check hearing in pediatric consultations? (Yes / No)
3. 3. In which situations do you refer a child for hearing evaluation? (Select all that apply)
4. - Clinical signs during examination
5. - Parental concern
6. - High-risk medical history
7. - Systematically for all children
8. 4. Do you believe parental concern alone is sufficient for referral to a specialist? (Likert Scale)
9. 5. Does early intervention improve language development in children with hearing loss? (Likert Scale)
10. 6. How important is neonatal hearing screening? (Very important / Fairly important / Not important / Not sure)

## Section 3: Knowledge and Clinical Practice Related to Hearing Loss

1. 1. Which of the following are recognized risk factors for childhood hearing loss? (Select all that apply)
2. - Bacterial meningitis
3. - Ototoxic medications
4. - Neonatal intensive care stay
5. - In utero CMV infection
6. - Congenital syphilis
7. - Cleft palate
8. - Apgar score ≤4 at 1 minute or ≤6 at 5 minutes
9. - Recurrent viral infections
10. - Male gender
11. 2. Do you follow a specific protocol for at-risk children? (Yes / No – If yes, please describe)
12. 3. Are you familiar with the classification of hearing loss severity? (Yes / No – If yes, specify)
13. 4. Are you familiar with the types of hearing loss? (Yes / No – If yes, list them)
14. 5. Which tests are appropriate to assess hearing in infants and toddlers? (Select all that apply)
15. - Auditory Brainstem Response (ABR/PEA)
16. - Automated Auditory Brainstem Response (AABR)
17. - Behavioral audiometry
18. - Pure tone audiometry
19. - Otoacoustic emissions (OAE)
20. - Auditory Steady-State Responses (ASSRs)
21. 6. At what age can a child's hearing be assessed reliably?
22. 7. At what age can a child be fitted with a hearing aid?
23. 8. Should children with severe hearing loss fitted with hearing aids always receive speech therapy? (Likert Scale)
24. 9. What are the indications for cochlear implantation?
25. 10. From what age can a child receive a cochlear implant?
26. 11. Do you think a cochlear implant allows a child to develop normal spoken language? (Likert Scale)
27. 12. Do you think a cochlear implant allows a child to attend regular school? (Likert Scale)
28. 13. Are there emergency situations requiring urgent cochlear implantation? (Yes / No – If yes, describe)
29. 14. Are you aware of any health insurance covering audiological services? (Yes / No / Not sure)
30. 15. What format of continued education would you prefer? (Round table / Online modules / Workshops / Printed material)
